# Supplementary material
Source: Springer Nature journal article supplement (https://www.springermedizin.de/resource/supplementary/13054_2004_3487_MOESM5_ESM.pdf/9720592)

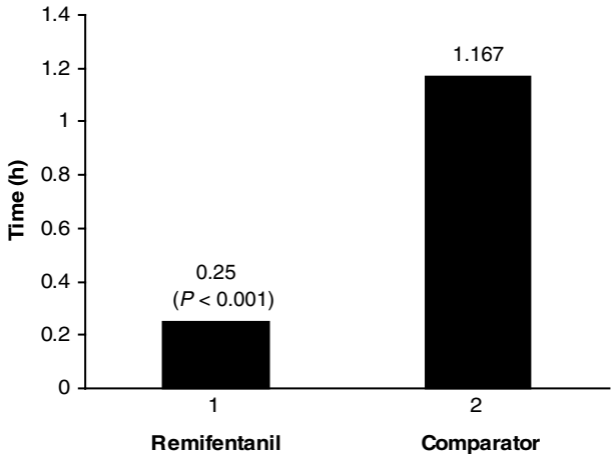

Supplement: MOESM5 [file 9720592]
